# Supplementary material for: A unique route to fabricate mesoporous carbon with abundant ferric species as a heterogeneous Fenton catalyst under neutral conditions
Source: Royal Society of Chemistry journal article supplement (doi:10.1039/c5ra19233a), 2015-01-01
Supplement: c5ra19233a1.pdf [file c5ra19233a1.pdf]

## Supporting Information

### **A unique route to fabricate mesoporous carbon with abundant ferric species as heterogeneous Fenton catalyst under neutral condition**

Min Wang, Lingxia Zhang\*, Xiangqian Fan, Yajun Zhou, Lisong Chen, Qinglu Kong,  
Jianlin Shi

State Key Laboratory of High Performance Ceramics and Superfine Microstructure,  
Shanghai Institute of Ceramics, Chinese Academy of Sciences, 1295 Dingxi Road,  
Shanghai 200050, PR China

Corresponding author. \*E-mail: zhlingxia@mail.sic.ac.cn Tel: +86 21 52412700. Fax: +86 21  
52413122

Table S1. Pore structural parameters of the prepared KIT-6 and mesoporous Fe/mC catalysts.

| catalyst    | $S_{\text{BET}}$<br>( $\text{m}^2\cdot\text{g}^{-1}$ ) | $d_{\text{BJH}}$<br>(nm) | Pore volume<br>( $\text{cm}^3\cdot\text{g}^{-1}$ ) |
|-------------|--------------------------------------------------------|--------------------------|----------------------------------------------------|
| KIT-6       | 758.4                                                  | 5.32                     | 0.82                                               |
| Fe/mC-450-H | 689.2                                                  | 3.96                     | 0.36                                               |
| Fe/mC-450-N | 675.7                                                  | 3.42                     | 0.31                                               |
| Fe/mC-800-H | 340.8                                                  | 4.36                     | 0.27                                               |

Table S2. XPS of Fe 2p in mesoporous Fe/mC catalysts.

| catalyst    | Fe <sup>2+</sup> | Fe <sup>3+</sup> | Fe <sup>0</sup> |
|-------------|------------------|------------------|-----------------|
| Fe/mC-450-N | 51.47%           | 48.53%           | 0               |
| Fe/mC-450-H | 42.58%           | 36.34%           | 21.08%          |

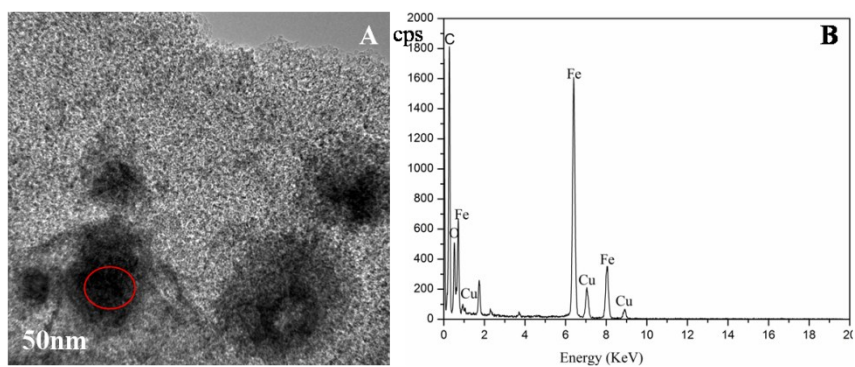

Figure S1. TEM images of the mesoporous Fe/mC-800-H (A) and the corresponding EDS pattern.

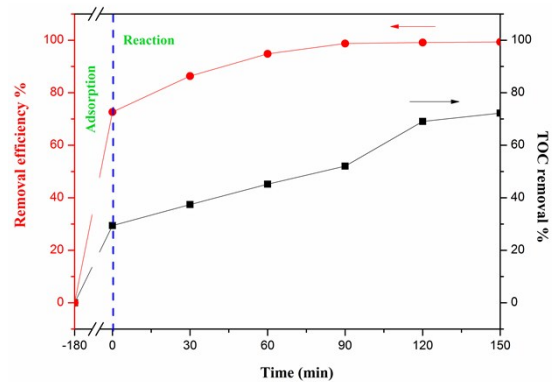

Figure S2 Removal efficiency and relative TOC removal of the MB solution (0.6 g. L<sup>-1</sup> catalysts, 200 mg. L<sup>-1</sup> MB, 150 mM H<sub>2</sub>O<sub>2</sub>, 25 °C) on the sample Fe/mC-450-H.

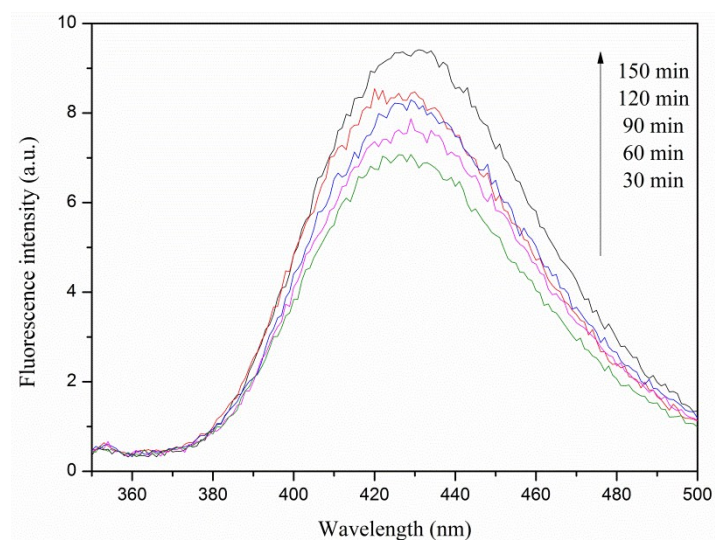

Figure S3 PL spectra recorded during the degradation on the Fe/mC-450-H sample in 2 mM NaOH solution in the presence of 0.5 mM terephthalic acid.
